# Supplementary material for: Conserved targeting information in mammalian and fungal peroxisomal tail-anchored proteins
Source: PubMed Central journal article supplement (PMC4667187; doi:10.1038/srep17420), 2015-12-02
Supplement: srep17420-s1.pdf [file srep17420-s1.pdf]

## Supplementary Information

# Conserved targeting information in mammalian and fungal peroxisomal tail-anchored proteins

Judith Büntzel, Fabio Vilardi, Amelie Lotz-Havla, Jutta Gärtner, Sven Thoms

### Supplementary Tables

**Table S1.** Statistical analysis of glycosylation.

**Table S2.** Oligonucleotides used in this study

**Table S3.** Plasmids used in this study

**Table S4.** Yeast strains used in this study

### Supplementary Figures

**Figure S1.** Full-size uncropped Western blots and autoradiographs of all figures.

**Figure S2.** Gray-scale representations of single channel images of figures 1h, i and 3a, b.

**Figure S3.** Targeting of PEX26 TMD and C-segment to the peroxisome in yeast.

## Supplementary Tables

|                     | <b>Fig.</b> | <b>Gel lane</b> | <b>Mean (%)</b> | <b>S.e.m.</b> | <b>P value</b> |
|---------------------|-------------|-----------------|-----------------|---------------|----------------|
| Wild-type           | 4a          | 2               | 69              | 3.9           |                |
| <i>DAmP-Sec62</i>   | 4a          | 3               | 73              | 4.4           | 0.5100         |
| <i>Δsec72</i>       | 4a          | 4               | 74              | 3.5           | 0.4700         |
| <i>Δget2</i>        | 4a          | 5               | 15              | 2.7           | <0.0001        |
| <i>Δget3</i>        | 4a          | 8               | 13              | 1.6           | <0.0001        |
| <i>Δget5</i>        | 4a          | 6               | 18              | 3.4           | <0.0001        |
| <i>Δget1/2</i>      | 4a          | 7               | 17              | 5.2           | <0.0001        |
| <i>Δget1/2/3</i>    | 4a          | 9               | 20              | 7.8           | 0.0002         |
| <i>Δpex19</i>       | 5a          | 2               | 91              | 3.2           | 0.0018         |
| <i>Δpex19 Δget3</i> | 5c          | 5               | 44              | 1.5           | 0.0039         |

**Table S1.** Quantification of glycosylation of PEX26 expressed in yeast strains

| Name       | Sequence (5' to 3')                                                |
|------------|--------------------------------------------------------------------|
| OST526     | AAGTATTGACGGAAAGAAGAAATGCCAAACATACAACACGAAGTACGTACGCTGCAGGTCGAC    |
| OST527     | TTACTGTTATCATAAAATATATATACCTTATTGTTGTTTGAACCGATCGATGAATTCGAGCTCG   |
| OST562     | GGCCGAATTCCTTGTACAGCTCGTCCATG                                      |
| OST751     | GTCCCGGCCCGCGCGCCGGCCGTG                                           |
| OST752     | CACGCCGGCGCGCGGGCCGGGAC                                            |
| OST753     | CCTGGACTTCCGCGCGGCGCTGGAG                                          |
| OST754     | CTCCAGCGCCGCGCGGAAGTCCAGG                                          |
| OST755     | GACCTGCGAGCGCGCTGGCAGAGTC                                          |
| OST756     | GACTCTGCCAGGCGCGCTCGCAGGTC                                         |
| OST757     | GGCAGAAATGGATCGCTGGCAAGAAGTCCTC                                    |
| OST758     | GAGGACTTCTTGCCAGCGATCCATTTCTGCC                                    |
| OST789     | GAATTCACGTGCAGAGGGTGTGCTGCCTC                                      |
| OST790     | GTACATCCAGTCGCCTCTCCTCACCAAAGG                                     |
| OST791     | CTCTCCGCTGGATCAGGAAGGCTGCATTTTC                                    |
| OST792     | GAAAATGCAGCCTTCTGTATCCAGCGGAAGAG                                   |
| OST921     | AATTCGGTCCAAACTTCTACGTCCCATTTCTCCAACAAGACCGGTTAG                   |
| OST922     | TCGACTAACCGGTCTTGTGGAGAATGGGACGTAGAAGTTTGGACCG                     |
| OST957     | ACTAGTTCTAGAATGAAGAGCGATTCTTCGACC                                  |
| OST958     | CGCGGAATTCGTACGGATGCGGAGCTG                                        |
| OST1052    | GCGCCTCGAGCTAGCCCGTCTTGTGGAGAA                                     |
| OST1088    | CGCGCTCGAGCTAACCGGTCTTGTGGAGAATGGGACGTAGAAGTTTGGACCCGGACGGATGCGGAG |
| OST1101    | GCGCTCTAGAAGTGTGCAAGTGAGATAAT                                      |
| OST1102    | GCATCATTTACAAGAAGTCAAAAAGAGTCTCCTGGCTG                             |
| OST1103    | GCCAGGAGACTCTTTTGGACTTCTTGTGAAATGATGC                              |
| OST1176    | CAGCTCCGCATCCGTGACTGAGAATTCGGTCCAAACTTC                            |
| OST1177    | GAAGTTTGGACCGAATTCTCAGTCACGGATGCGGAGCTG                            |
| OST1194    | GGAAGGCTGCATTTTCTGCCCTCTACCAGCTCCGAATCCG                           |
| OST1195    | CGGATGCGGAGCTGGTAGAGGGCAGAAAATGCAGCCTTCC                           |
| OST1196    | CTCGCTCTACCAGCTCGCCATCGCTGACGGTCCTAACTTCTACG                       |
| OST1197    | CGTAGAAGTTAGGACCGTCAGCGATGGCGAGCTGGTAGAGGCGAG                      |
| OST1272    | CGCGTCTAGAATGGTGAAGCAAGGGCGAG                                      |
| OST1273    | CGCGGAATTCATGAAGAGCGATTCTTCGAC                                     |
| OST1274    | CGCGCTCGAGCTAACCGGTCTTGTGGAA                                       |
| OST1275    | GAAGCATCATTTACAAGAAGTAAAAAGAGTCTCCTGGCTGCC                         |
| OST1276    | GGCAGCCAGGAGACTCTTTTACTTCTTGTGAAATGATGCTTC                         |
| OST1301    | GCGCGAATTCCTCAAAAAGAGTCTCCTGGCT                                    |
| OST1303    | CGCGCTCGAGCTAGTCACGGATGCGGAG                                       |
| Asna1-F    | GAATTCCTCCACCATGGCGGCAGGGGTG                                       |
| Asna1myc-R | CTACTACAAGTCTCTTCAGAAATGAGCTTTTGTCTCCTGGGCACTGGGGGGCTT             |

**Table S2. Oligonucleotides used in this study**

| Number  | Name                                        | Source                        |
|---------|---------------------------------------------|-------------------------------|
|         | pFA6-hphNT1                                 | Janke et al. <sup>61</sup>    |
| PST802  | pSM1960                                     | Metzger et al. <sup>64</sup>  |
| PST809  | pRS425                                      | Mumberg et al. <sup>65</sup>  |
| PST811  | pRS425-SEC63-RFP                            | This study                    |
| PST814  | p416TEF                                     | Mumberg et al. <sup>65</sup>  |
| PST904  | pRS416GAL1                                  | Mumberg et al. <sup>65</sup>  |
| PST994  | pcDNA3.1(-)                                 | Invitrogen                    |
|         | HcRed-SKL                                   | E. Hettema <sup>4</sup>       |
| PST1117 | pAG416-GPD-EGFP-ccdB                        | Alberti et al. <sup>66</sup>  |
| PST1126 | pAG416-GPD-PEX15                            | This study                    |
| PST1127 | pAG416-GPD-PEX15ΔTMD                        | This study                    |
| PST1133 | pEXPVenusPEX15                              | This study                    |
| PST1134 | pEXPVenus-PEX15ΔTMD                         | This study                    |
| PST1135 | pCR3.1-Myc-PEX26                            | This study                    |
| PST1137 | pCR3.1Myc-PEX15                             | This study                    |
| PST1138 | pCR3.1Myc-PEX15ΔTMD                         | This study                    |
| PST1147 | pENTR221-PEX26                              | This study                    |
| PST1165 | pDONR207                                    | Invitrogen                    |
| PST1173 | pcDNA3.1-TRC40_WTmyc                        | Horst et al. <sup>38</sup>    |
| PST1174 | pcDNA3.1-TRC40_SW1myc                       | Horst et al. <sup>38</sup>    |
| PST1183 | pDEST-N-Venus                               | Alberti et al. <sup>66</sup>  |
| PST1193 | pENTR221-PEX26 <sup>co</sup>                | This study                    |
| PST1310 | pAG416-GPD-EGFP-PEX26 <sup>co</sup>         | This study                    |
| PST1311 | pAG416-GPD-1EGFP-PEX26                      | This study                    |
| PST1326 | pENTR221-PEX15                              | This study                    |
| PST1340 | pAG416-GPD-ccdB                             | Alberti et al. <sup>66</sup>  |
| PST1341 | pAG416-GAL1-EGFP-ccdB                       | Alberti et al. <sup>66</sup>  |
| PST1362 | pcDNA3.1(-)-PEX26-EcoRI- opsin              | This study                    |
| PST1380 | pcDNA3.1 (-)-PEX26-opsin                    | This study                    |
| PST1413 | p416TEF-PEX15ΔTMD-PEX26ΔSTOP                | This study                    |
| PST1414 | pcDNA 3.1-TRC40_GR                          | This study                    |
| PST1486 | pAG416-GAL1-EGFP-PEX26 <sup>co</sup>        | This study                    |
| PST1565 | pRS416TEF-PEX15ΔTMD-PEX26                   | This study                    |
| PST1566 | pENTR221 PEX15ΔTMD                          | This study                    |
|         | pQE80-MBP-TRC40_GR                          | Favaloro et al. <sup>67</sup> |
|         | pcDNA3.1/V5-His-TOPO                        | Invitrogen                    |
|         | pDONR221                                    | Invitrogen                    |
|         | pCR3.1-Myc                                  | Invitrogen                    |
| pJB2    | pRS416GAL1-EcoRI-opsin                      | This study                    |
| pJB3    | pRS416GAL1-PEX26 <sup>co</sup> -EcoRI-opsin | This study                    |
| pJB8    | pRS416GAL1-PEX26 <sup>co</sup> opsin        | This study                    |

|       |                                            |            |
|-------|--------------------------------------------|------------|
| pJB26 | pRS416GAL1-EGFP                            | This study |
| pJB27 | pRS416GAL1-EGFP-PEX26 <sup>co</sup> -opsin | This study |
| pJB31 | p416TEF-EGFP                               | This study |
| pJB36 | p416TEF-EGFP-PEX26 253-305                 | This study |

**Table S3. Plasmids used in this study**

| <b>Strain</b>                           | <b>Source</b>                                   |
|-----------------------------------------|-------------------------------------------------|
| Wild-type BY4741                        | Euroscarf (Frankfurt)                           |
| $\Delta get1/ \Delta get2/ \Delta get3$ | Schuldiner et al. <sup>22</sup>                 |
| $\Delta get1/ \Delta get2$              | Schuldiner et al. <sup>22</sup>                 |
| $\Delta get3$                           | Schuldiner et al. <sup>22</sup>                 |
| $\Delta get5$                           | Yeast Consortium Deletion Library <sup>68</sup> |
| $\Delta pex15$                          | Yeast Consortium Deletion Library <sup>68</sup> |
| $\Delta pex19$                          | Yeast Consortium Deletion Library <sup>68</sup> |
| $\Delta sec72$                          | Yeast Consortium Deletion Library <sup>68</sup> |
| DAmP-sec62                              | Schuldiner et al. <sup>63</sup>                 |
| $\Delta pex19\Delta get3$               | This study                                      |

**Table S4. Yeast strains used in this study**

Fig. 1 (b)

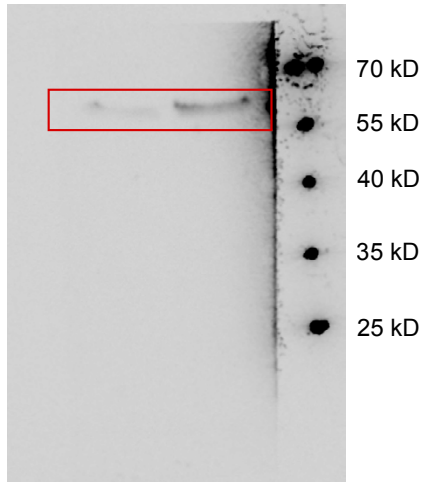

anti-GFP

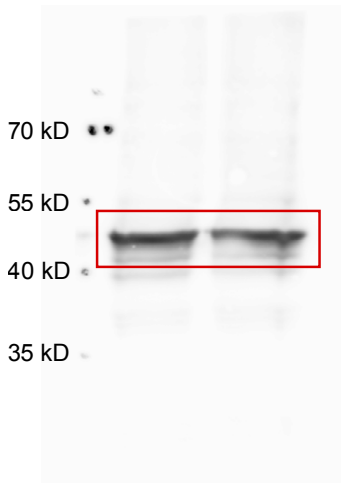

anti-PGK

Fig. 2 (b)

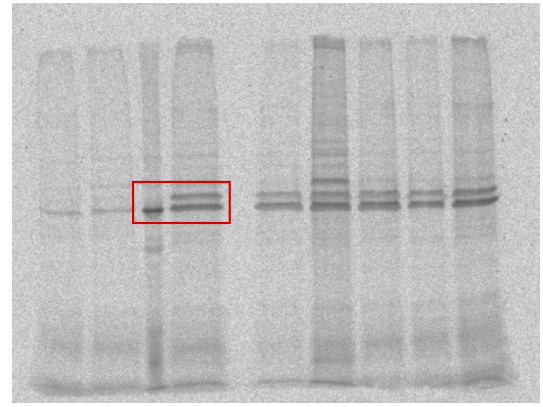

autoradiograph

Fig. 2 (c)

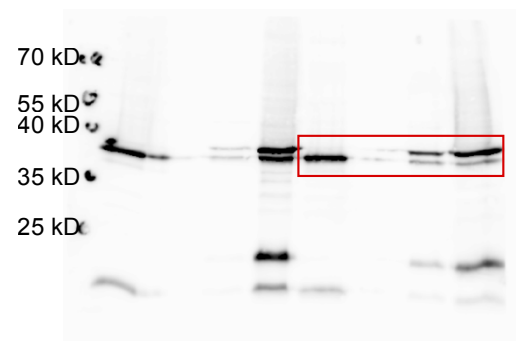

anti-opsin

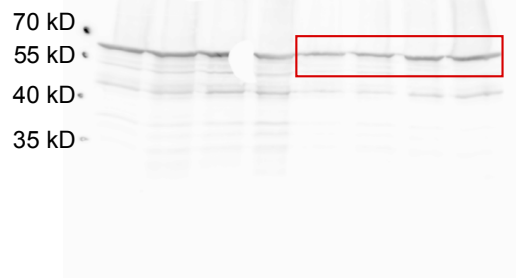

anti-PGK

Fig. 2 (a)

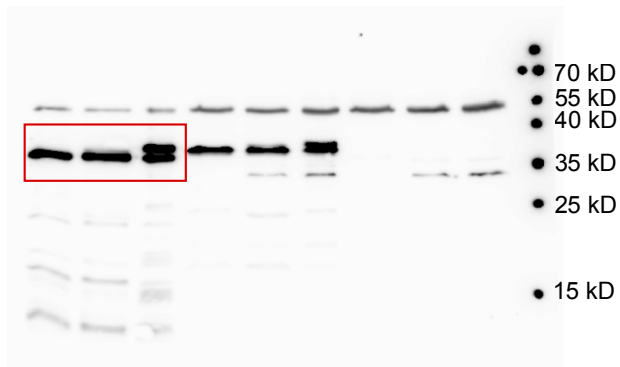

PEX26-opsin

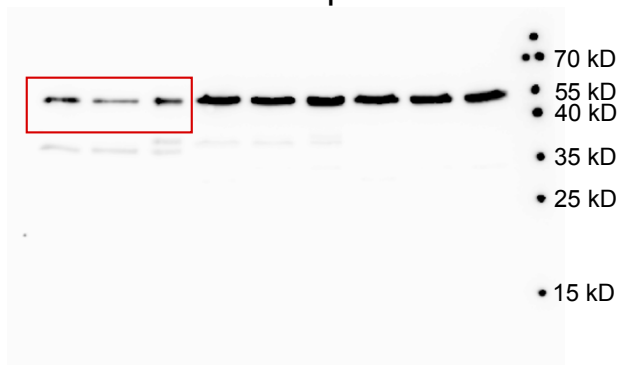

alpha-tubulin

Fig. 4 (a)

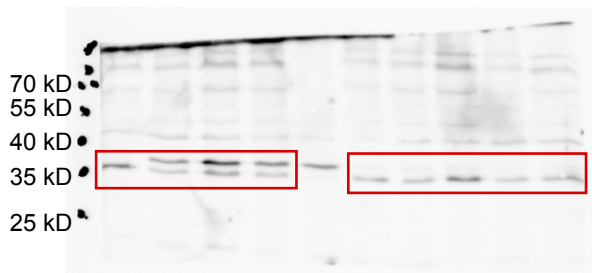

anti-opsin

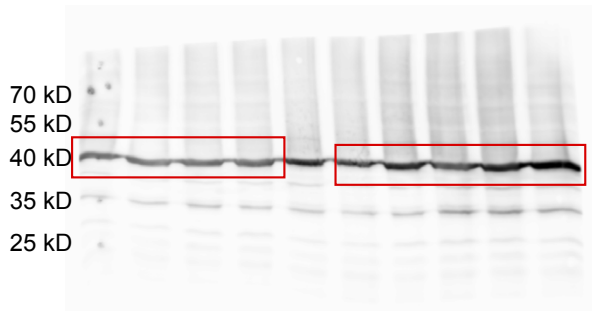

anti-PGK

Fig. 4 (d)

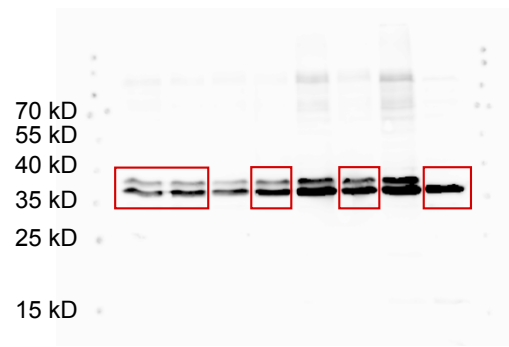

anti-opsin

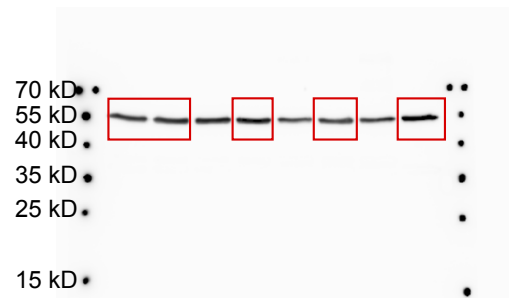

anti-PGK

Fig. 4 (b)

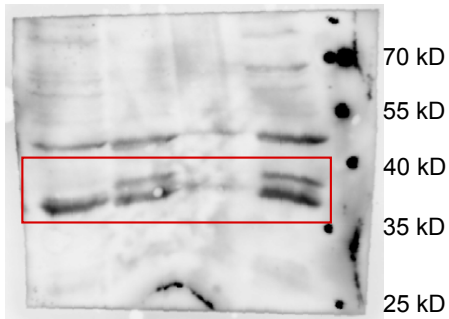

anti-opsin

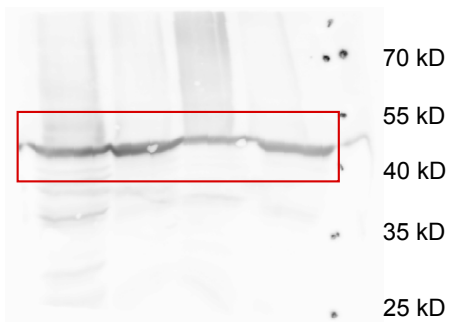

anti-PGK

Fig. 4 (e)

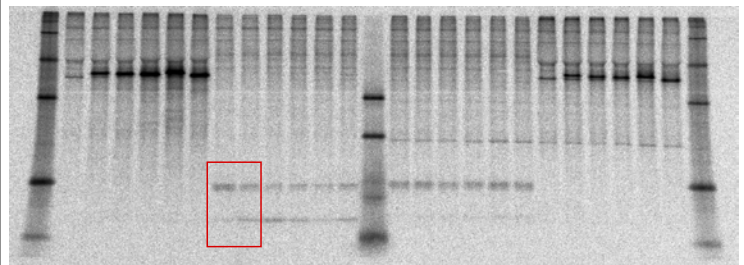

autoradiograph

Fig. 4 (f)

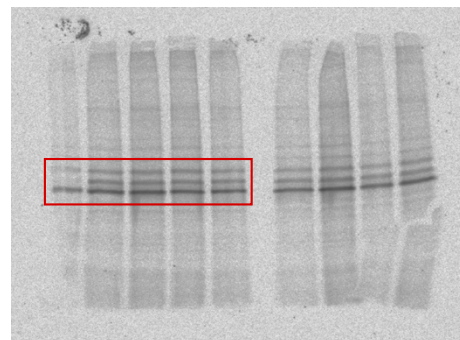

autoradiograph

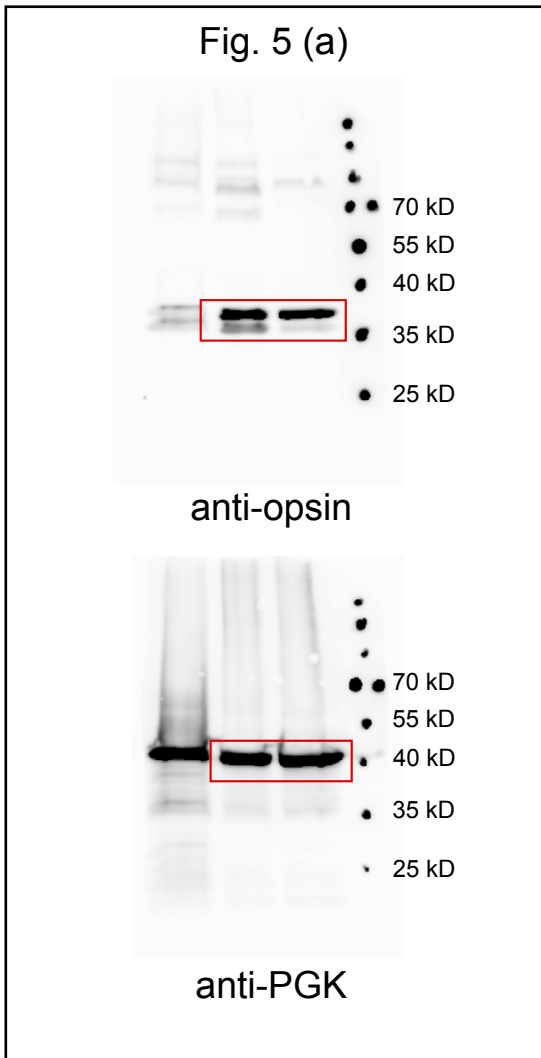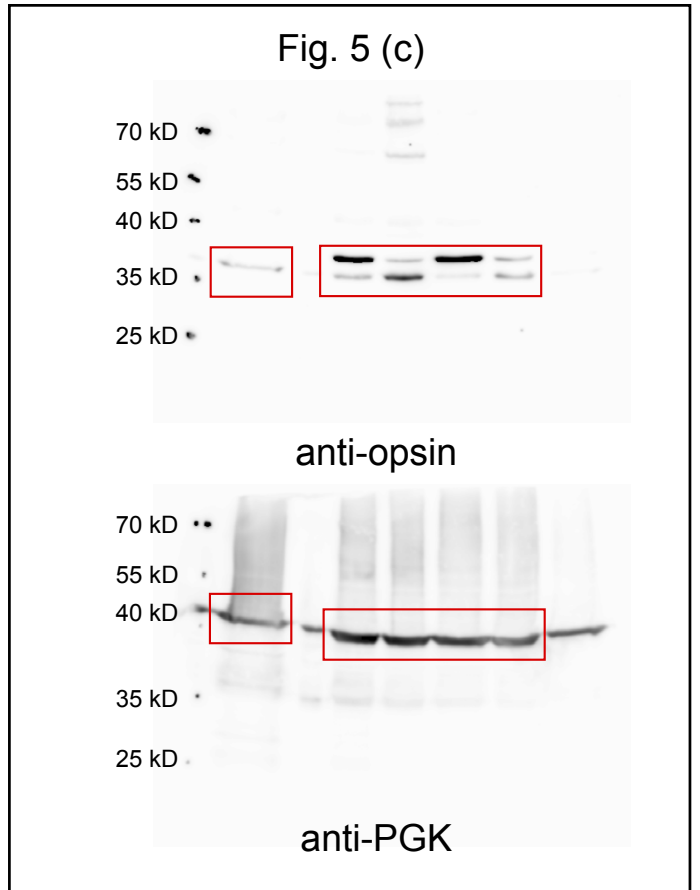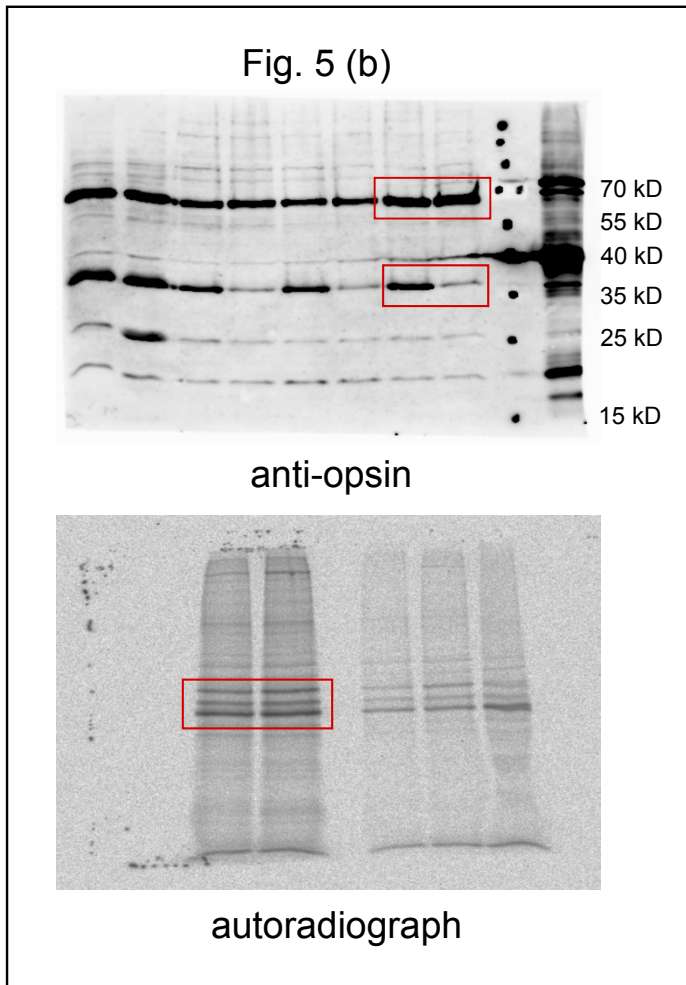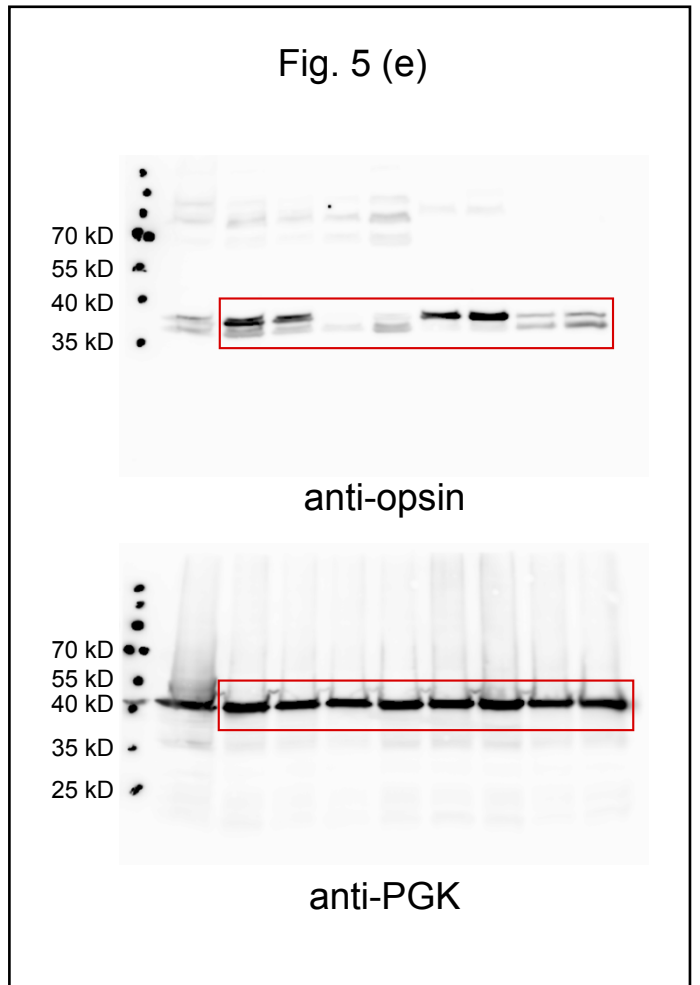

**Figure S1.** Full-size uncropped Western blots and autoradiographs of all figures.

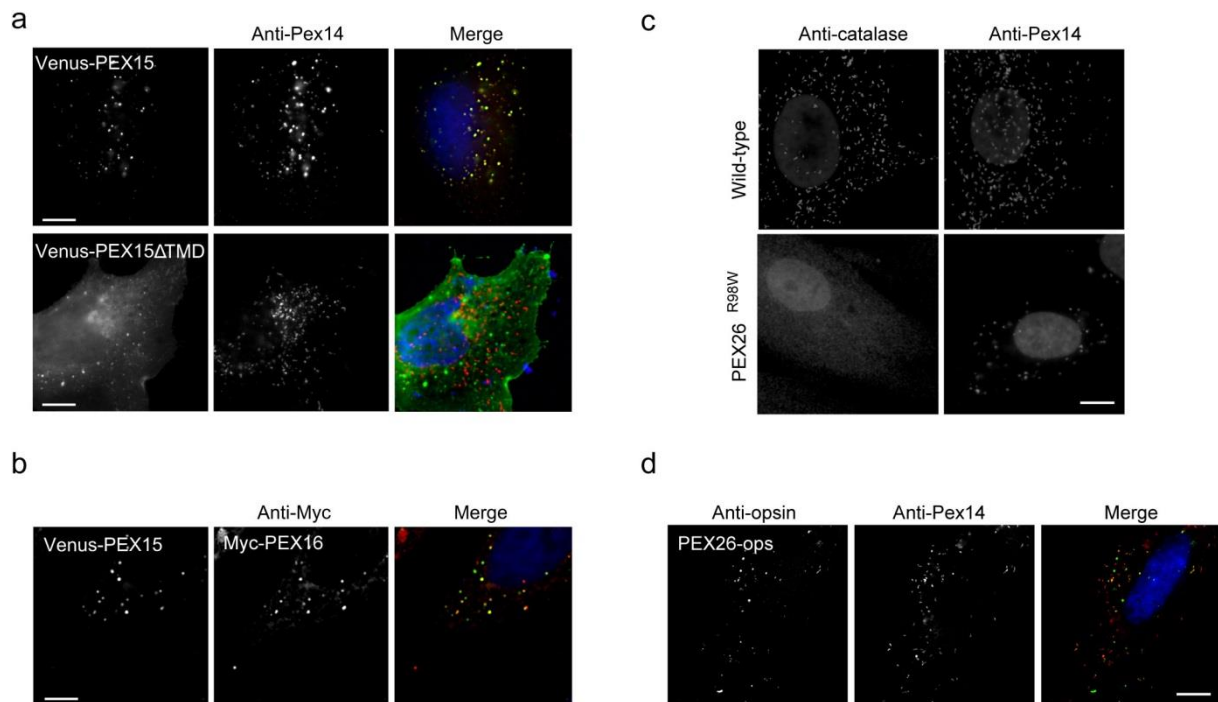

**Figure S2.** Gray-scale representations of single channel images of figures 1h, i and 3a, b.

(a) Yeast Pex15 localizes to peroxisomes in HaLa cells. Peroxisome targeting is dependent on TMD and luminal segment of Pex15. Direct fluorescence of Venus-Pex15 and Venus-Pex15 $\Delta$ TMD shows co-localization with the peroxisome marker PEX14 (immunofluorescence) and cytosolic localization, respectively. (b) PEX26 and Pex15 are recruited to the same population of peroxisomes. Direct fluorescence of Venus-Pex15, immunofluorescence of Myc-PEX26, both proteins co-localize. Bar = 10  $\mu$ m. (c) Deficiency in PEX26 leads to impaired peroxisome maturation. Fibroblasts of a control and a patient carrying a PEX26<sup>R98W</sup> mutation were stained for the peroxisomal matrix protein catalase and the PMP PEX14. Catalase import is impaired in patient fibroblasts, peroxisomes are less abundant and larger than in wild-type. Bar = 10  $\mu$ m. (d) Expression of Myc-PEX26 in PEX26<sup>R98W</sup> fibroblasts partially rescues peroxisome maturation and import of catalase. Bar = 10  $\mu$ m.

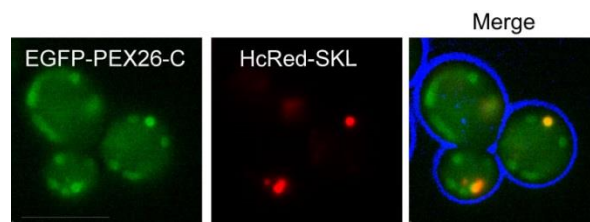

**Figure S3.** Targeting of PEX26 TMD and C-segment to the peroxisome in yeast.

(a) Conserved peroxisomal targeting information of PEX26 resides in the TMD and the luminal C-segment. PEX26-C, a truncated version of PEX26 (amino acids 252 to 305), was fused to N-terminal EGFP. Constitutive, TEF promoter-driven expression in wild-type yeast. EGFP-PEX26-C puncta partially co-localize with the peroxisomal marker HcRed-SKL.
